# Supplementary material for: Discrete and polymeric complexes formed from cobalt(ii), 4,4′-bipyridine and 2-sulfoterephthalate: synthetic, crystallographic and magnetic studies
Source: Royal Society of Chemistry journal article supplement (doi:10.1039/c5ce00713e), 2015-01-01
Supplement: c5ce00713e1.pdf [file c5ce00713e1.pdf]

## *Supporting Information*

### **Five discrete and polymeric complexes formed from cobalt(II), 4,4'-bipyridine and 2-sulfoterephthalate: synthetic, crystallographic and magnetic studies**

*Amitabha Datta,<sup>\*a</sup> Chiara Massera,<sup>\*b</sup> Jack K. Clegg,<sup>\*c</sup> Guillem Aromí,<sup>d</sup> David Aguilà,<sup>d</sup>*

*Jui-Hsien Huang,<sup>\*a</sup> Sheng-Jie Chuang,<sup>a</sup>*

<sup>a</sup>Department of Chemistry, National Changhua University of Education, Changhua  
50058, Taiwan.

<sup>b</sup>Dipartimento di Chimica, Università degli Studi di Parma, Viale delle Scienze 17/A,  
43124 Parma, Italy

<sup>c</sup>School of Chemistry and Molecular Biosciences, The University of Queensland,  
Brisbane St Lucia, QLD 4072, Australia

<sup>d</sup>Departament de Química Inorgànica, Universitat de Barcelona, Martí i Franquès 1-11,  
08028 Barcelona, Spain

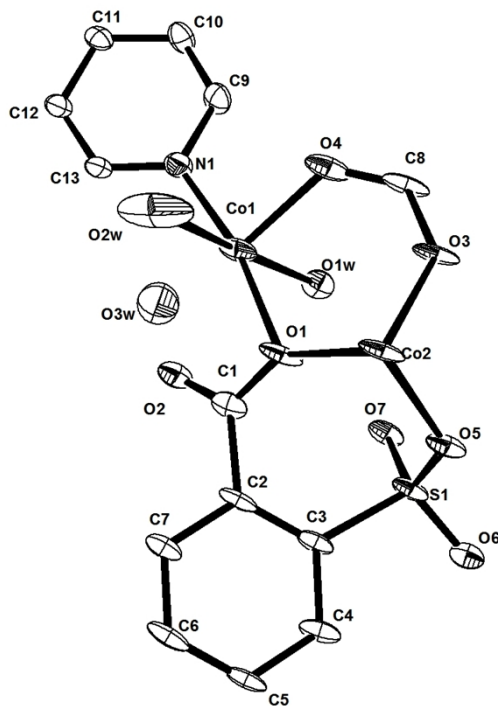

**Figure S1.** Ortep view (20% ellipsoid probability) of the asymmetric unit of compound **1**.

Hydrogen atoms have been omitted for clarity.

**Table S1.** H-bonding in  $\{[\text{Co}_3(2\text{-stp})_2(\text{bipy})(\text{H}_2\text{O})_4] \cdot 2\text{H}_2\text{O}\}_n$

| Intramonomeric H-bonding   |                              |
|----------------------------|------------------------------|
| D-H $\cdots$ A (Å)         | D-H $\cdots$ A (°)           |
| O1W $\cdots$ O7 2.767(9)   | O1W-H2W $\cdots$ O7 171.9(9) |
| O2W $\cdots$ O3W 2.953(9)  | -                            |
| O2W' $\cdots$ O3W 2.438(9) | -                            |
| O6 $\cdots$ O3W 2.953(2)   | -                            |

| Intermonomeric H-bonding        |             |
|---------------------------------|-------------|
| D-H...A (Å)                     | D-H...A (°) |
| O1W...O6 <sup>a</sup> 2.742(9)  | -           |
| O2W...O2W <sup>b</sup> 2.801(9) | -           |
| O3W...O3W <sup>c</sup> 3.167(9) | -           |

<sup>a</sup> -x+1/2,+y+1/2,-z+1/2; <sup>b</sup> -x, -y, -z; <sup>c</sup> -x,+y,-z-1/2

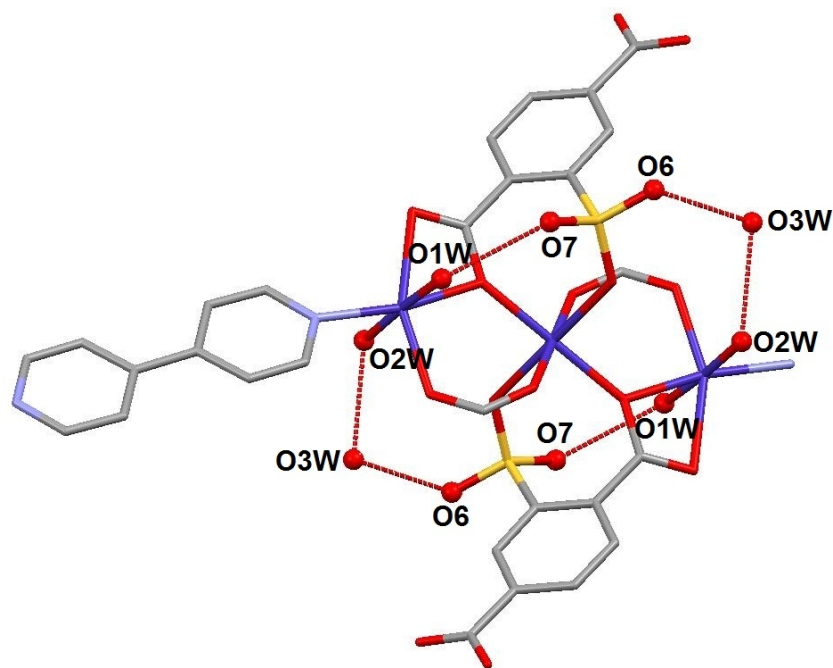

**Figure S2.** Intra-monomeric H-bonds (as red lines) in  $[\text{Co}_3(2\text{-stp})_2(\text{bipy})(\text{H}_2\text{O})_4] \cdot 2\text{H}_2\text{O}$ . The atoms belonging to adjacent monomers necessary to complete the coordination environment around the metal centers have been also included. Hydrogen atoms have been omitted for clarity.

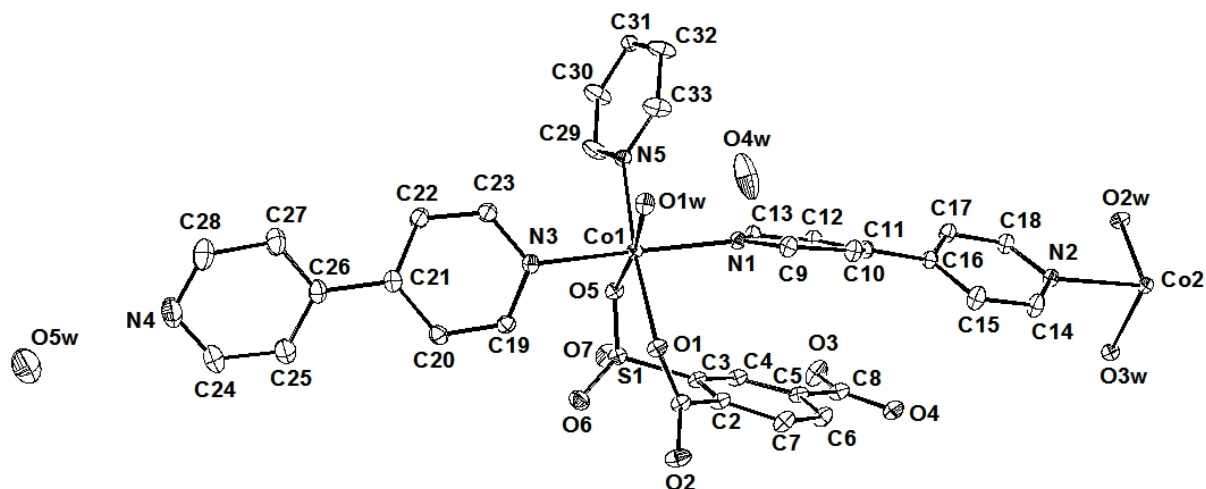

**Figure S3.** Ortep view (20% ellipsoid probability) of the asymmetric unit of compound **2**.

Hydrogen atoms have been omitted for clarity.

**Table S2.** H-bonding in  $\{[\text{Co}_3(\text{2-stp})_2(\text{bipy})_5(\text{H}_2\text{O})_6] \cdot 4\text{H}_2\text{O}\}_n$ .

| <b>Intra-monomeric H-bonding</b> |          |                    |           |
|----------------------------------|----------|--------------------|-----------|
| <b>D-H···A (Å)</b>               |          | <b>D-H···A (°)</b> |           |
| O1W···O4W                        | 2.674(3) | O1W-H1W···O4W      | 135.22(9) |
| O5W···N4                         | 2.947(5) | O5W-H9W···N4       | 158.83(9) |
| <b>Inter-monomeric H-bonding</b> |          |                    |           |
| <b>D-H···A (Å)</b>               |          | <b>D-H···A (°)</b> |           |

|                        |          |               |           |
|------------------------|----------|---------------|-----------|
| O5W...O7 <sup>a</sup>  | 2.980(4) | O5W-H10W...O7 | 142.05(8) |
| O2W...O1 <sup>a</sup>  | 2.672(2) | O2W-H4W...O1  | 161.22(9) |
| O3W...O2 <sup>a</sup>  | 2.621(3) | O3W-H5W...O2  | 175.35(9) |
| O4W...O3W <sup>b</sup> | 2.850(3) | O4W-H7W...O3W | 155.58(9) |
| O4W...O4 <sup>b</sup>  | 2.764(3) | O4W-H8W...O4  | 147.59(9) |
| O1W...O3 <sup>b</sup>  | 2.681(3) | O1W-H2W...O3  | 147.69(8) |
| O2W...O4 <sup>c</sup>  | 2.743(3) | O2W-H3W...O4  | 151.85(9) |
| O3W...O4 <sup>c</sup>  | 2.688(3) | O3W-H6W...O4  | 168.57(9) |

<sup>a</sup> x+1, y-1, z; <sup>b</sup> x, y-1, z; <sup>c</sup> x-1, y, z;

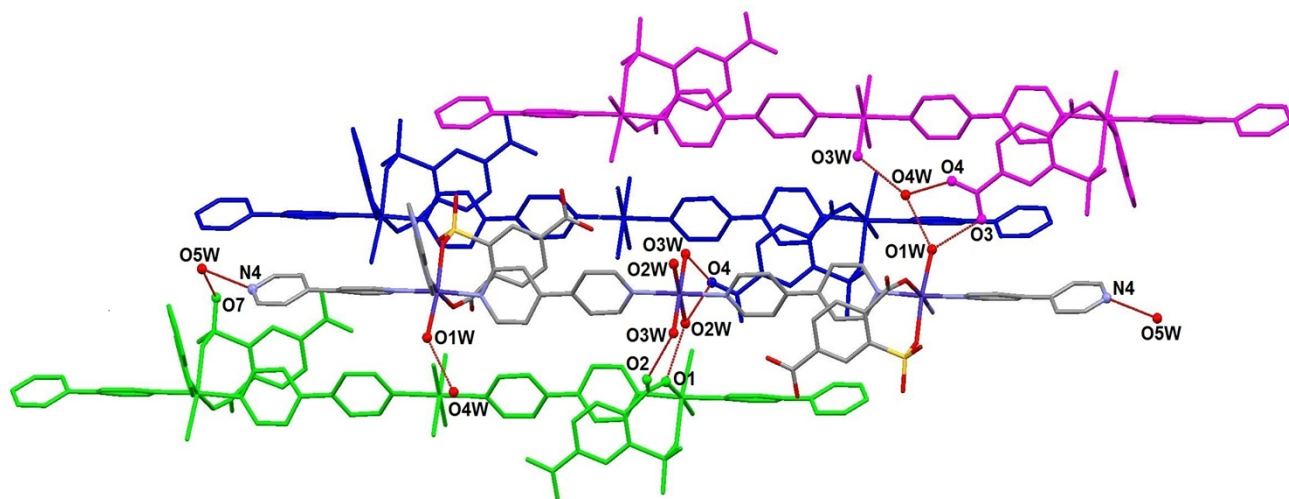

**Figure S4.** View of the H-bonding network in **2** (H-bonds are shown as red lines). The colored molecules are in the positions obtained applying the operations a (green), b

(magenta) and c (blue) (see Table S2) on the general coordinates. Hydrogen atoms have been omitted for clarity.

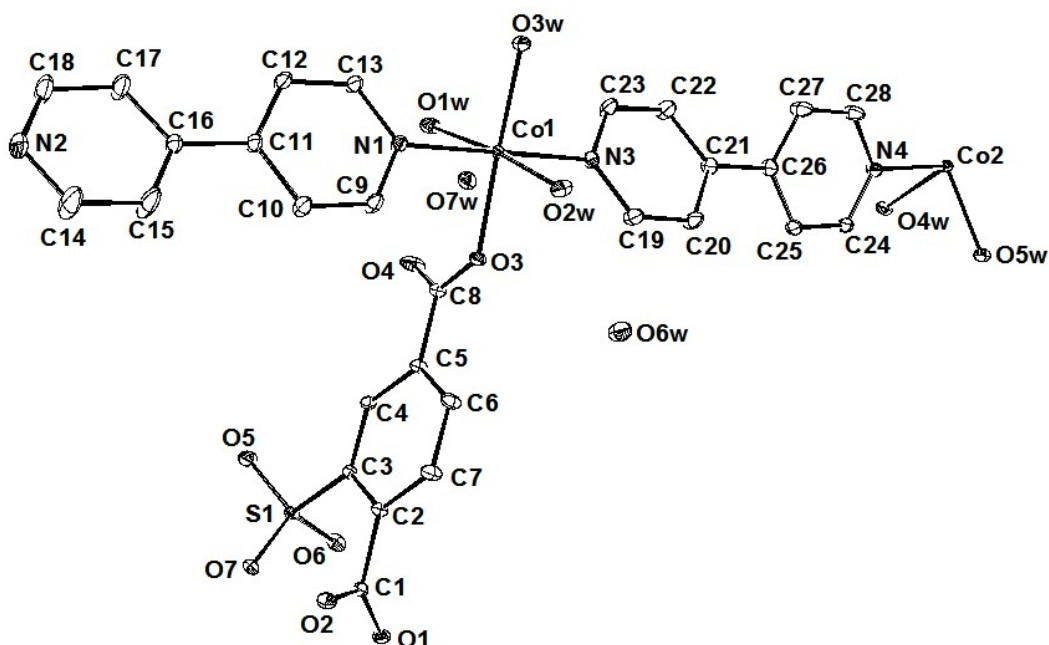

**Figure S5.** Ortep view (20% ellipsoid probability) of the asymmetric unit of compound **3**.

Hydrogen atoms have been omitted for clarity.

**Table S3.** Relevant H-bonding in  $[\text{Co}_3(2\text{-stp})_2(\text{bipy})_4(\text{H}_2\text{O})_{10}] \cdot 8\text{H}_2\text{O}$ .

| D-H···A (Å)            |          | D-H···A (°)   |        |
|------------------------|----------|---------------|--------|
| O2W···O6W              | 2.753(2) | O2W-H4W···O6W | 170(2) |
| O3W···O7W <sup>a</sup> | 2.719(2) | O3W-H5W···O7W | 160(2) |
| O2W···O4 <sup>a</sup>  | 2.808(2) | O2W-H3W···O4  | 172(3) |
| O6W···O6 <sup>a</sup>  | 2.808(2) | O6W-H12W···O6 | 172(3) |
| O3W···O2 <sup>b</sup>  | 2.736(2) | O3W-H6W···O2  | 173(2) |

|                       |          |               |        |
|-----------------------|----------|---------------|--------|
| O1W...O7 <sup>b</sup> | 2.740(2) | O1W-H2W...O7  | 172(3) |
| O7W...O5 <sup>b</sup> | 2.819(2) | O7W-H13W...O5 | 166(3) |
| O4W...O1 <sup>c</sup> | 2.731(2) | O4W-H8W...O1  | 176(3) |
| O5W...O7 <sup>c</sup> | 2.692(2) | O5W-H9W...O7  | 172(4) |
| O4W...O2 <sup>d</sup> | 2.835(2) | O4W-H7W...O2  | 156(3) |
| O5W...O2 <sup>e</sup> | 2.721(2) | O5W-H10W...O2 | 164(3) |

<sup>a</sup>  $x-1, +y, +z$ ; <sup>b</sup>  $x-1/2, -y+1/2, +z-1/2$ ; <sup>c</sup>  $-x+2, -y+1, -z$ ; <sup>d</sup>  $x, +y, +z-1$ ; <sup>e</sup>  $-x+1, -y+1, -z$ .

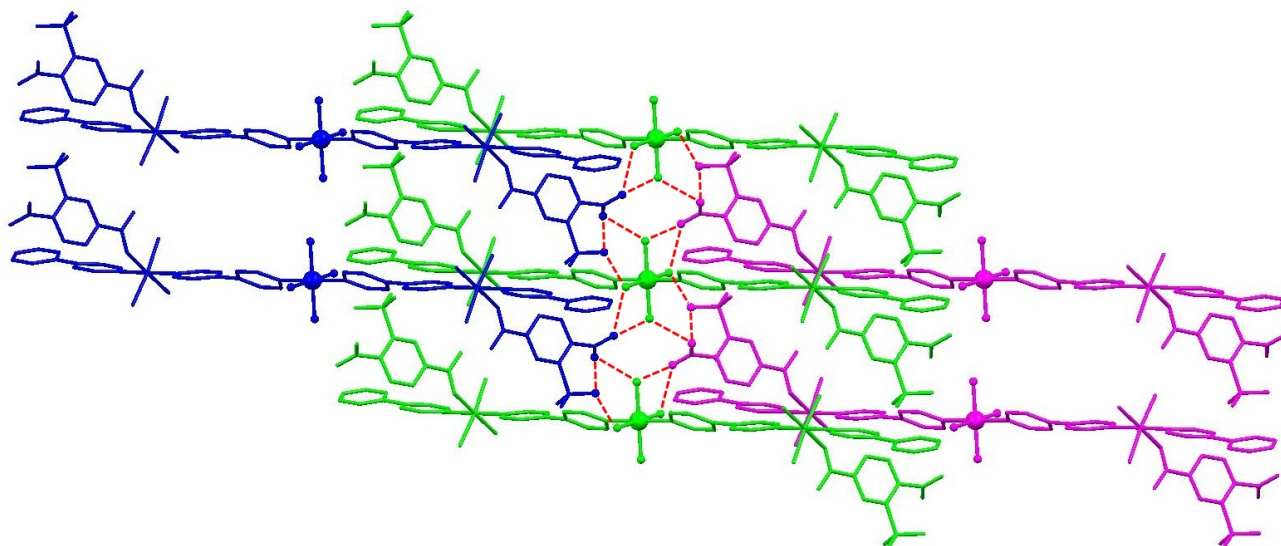

**Figure S6.** Hydrogen bonds formed by the water molecules surrounding Co2 (represented as red dotted lines) highlighted for one group of metal centers.



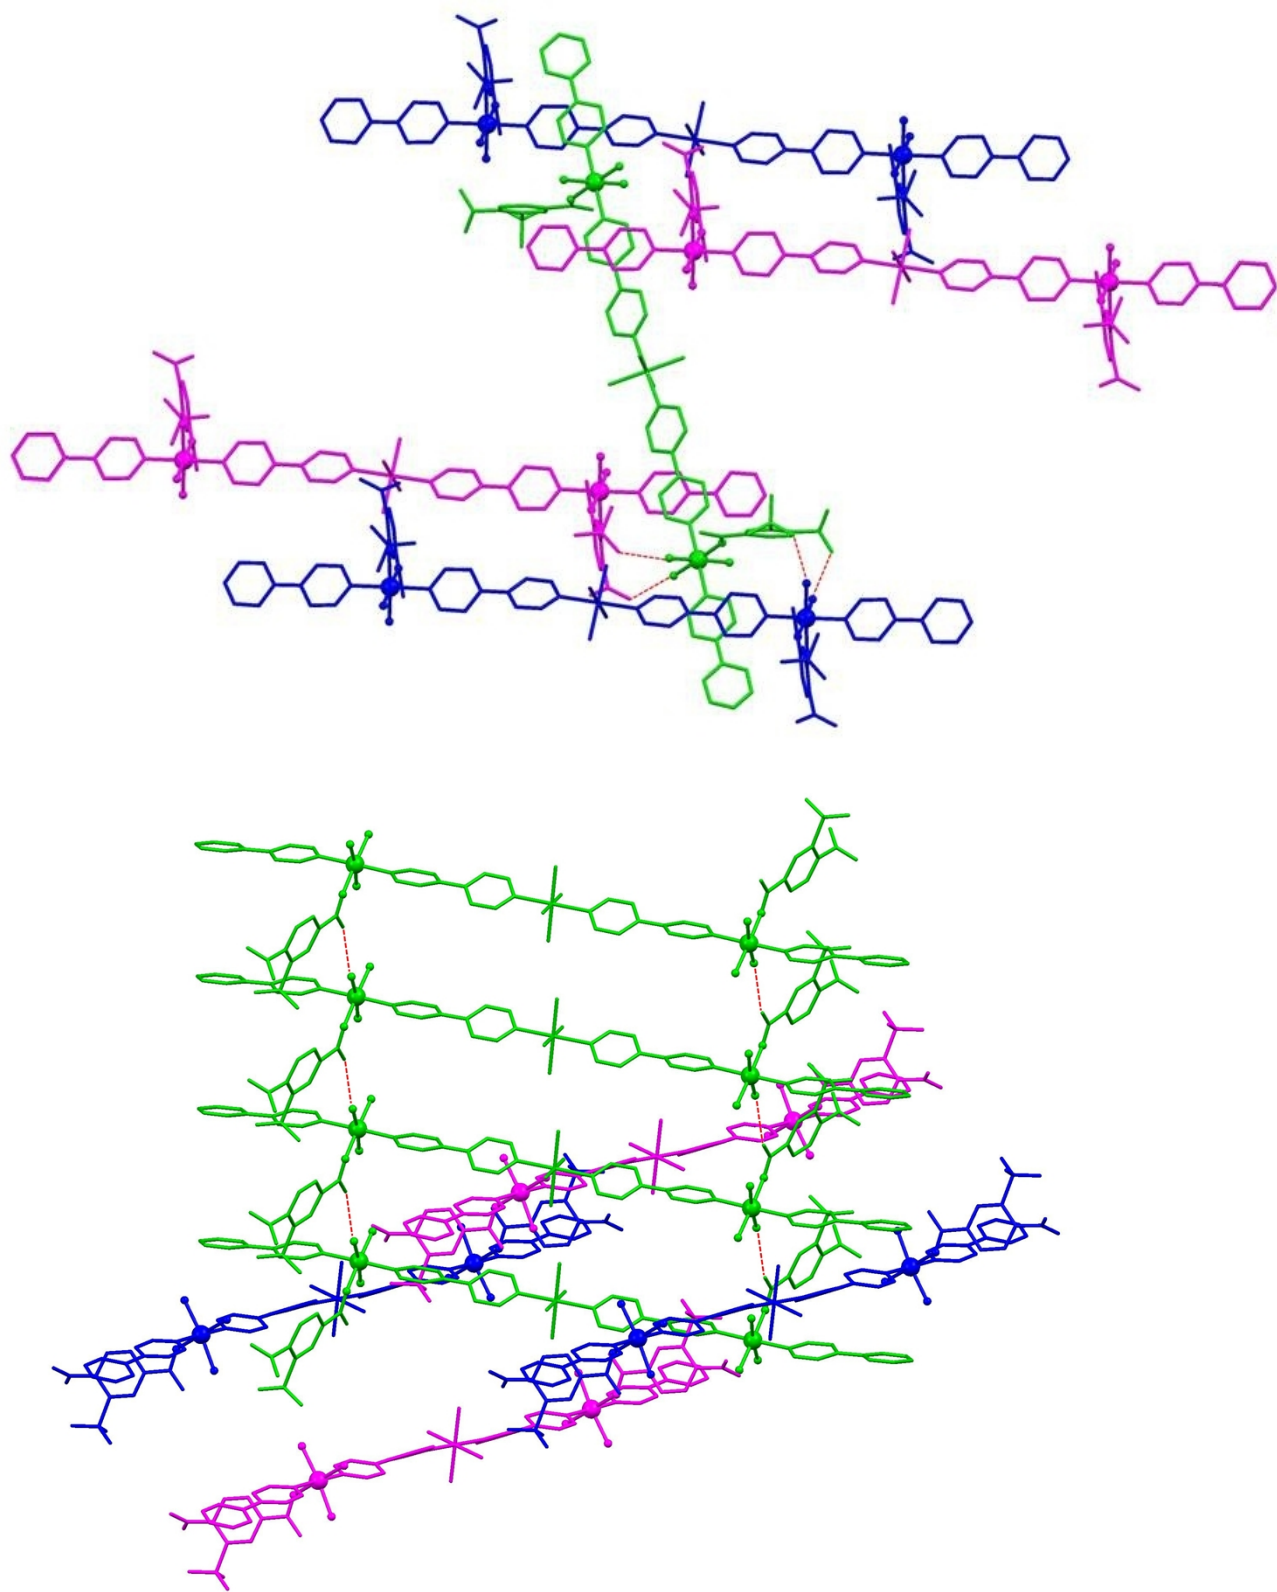

**Figure S7.** Two perspective views of the hydrogen bonds formed by the water molecules surrounding Co1 (represented as red dotted lines) highlighted for one group of metal centers.

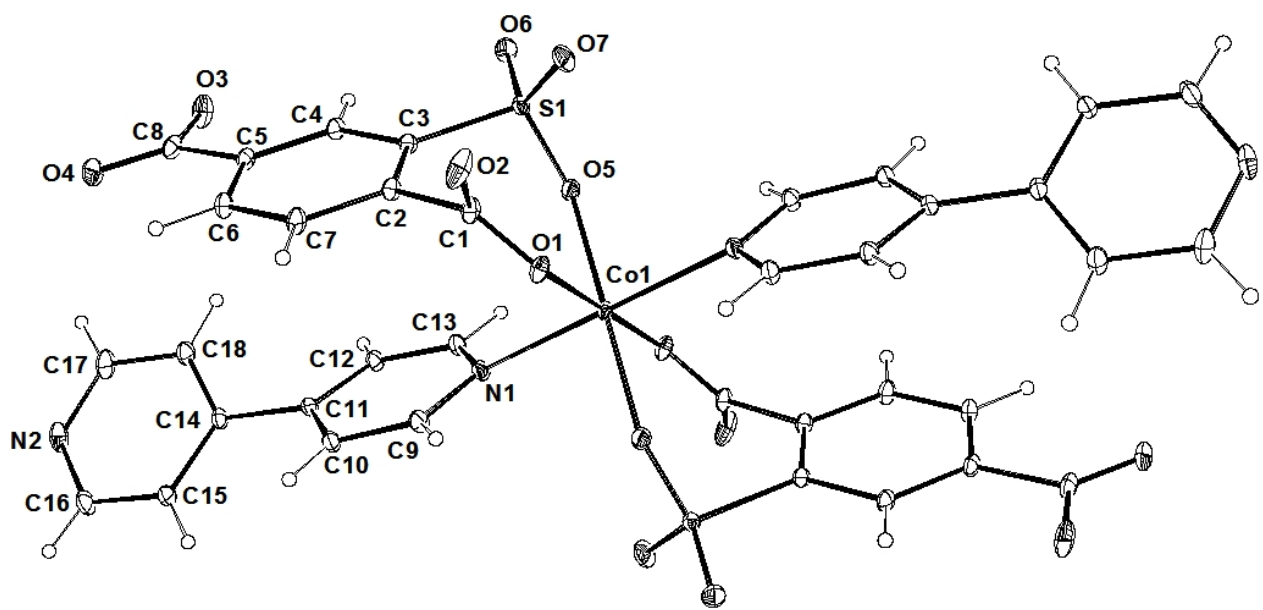

**Figure S8.** Ortep view (20% ellipsoid probability) of the symmetry-generated complex **4**  $[\text{Co}(\text{2-stpH}_2)_2(\text{bipy})_2]$ . The carboxylic hydrogen atoms which could not be located in the difference Fourier map are not shown.
